# Supplementary material for: Neptunyl(VI) Nitrate Coordination Polymer with Bis(2-pyrrolidone) Linkers Highlighting Crystallographic Analogy and Solubility Difference in Actinyl(VI) Nitrates
Source: MDPI journal article supplement (doi:10.3390/inorganics11030104), 2023-03-01
Supplement: s1 [file s1]

## Supplementary Materials

### Neptunyl(VI) Nitrate Coordination Polymer with Bis(2-pyrrolidone) Linkers Highlighting Crystallographic Analogy and Solubility Difference in Actinyl(VI) Nitrates

Tomoyuki Takeyama,<sup>1</sup> Juliane März,<sup>2</sup> Ryoma Ono,<sup>1</sup> Satoru Tsushima,<sup>2,3</sup> and Koichiro Takao<sup>1\*</sup>

<sup>1</sup>Laboratory for Zero-carbon Energy, Institute of Innovative Research, Tokyo Institute of Technology, 2-12-1 N1-32, O-okayama, Meguro-ku, 152-8550 Tokyo, Japan.

<sup>2</sup>Institute of Resource Ecology, Helmholtz-Zentrum Dresden-Rossendorf, Bautzner Landstraße 400, 01328 Dresden, Germany.

<sup>3</sup>International Research Frontiers Initiative (IRFI), Institute of Innovative Research, Tokyo Institute of Technology, 2-12-1 N1-32, O-okayama, Meguro-ku, 152-8550 Tokyo, Japan.

| Table of Contents                                                                                                                                                                                                                                                                                                                            | Page |
|----------------------------------------------------------------------------------------------------------------------------------------------------------------------------------------------------------------------------------------------------------------------------------------------------------------------------------------------|------|
| <b>Figure S1.</b> Packing diagram of $[\text{NpO}_2(\text{NO}_3)_2(\text{L1})]_n$ .                                                                                                                                                                                                                                                          | S2   |
| <b>Table S1.</b> Logarithmic Stability Constants ( $\log \beta$ ) of Typical Actinyl(VI) Complexes<br>( $\text{AnO}_2(\text{L})_n^{m+}$ ; An = U, Np, Pu; L = $\text{CO}_3^{2-}$ , $\text{CH}_3\text{COO}^-$ , $\text{F}^-$ , $\text{Cl}^-$ , $\text{NO}_3^-$ , $\text{SO}_4^{2-}$ ), in<br>Aqueous Systems at 298 K and Zero Ionic Strength | S3   |
| <b>References.</b>                                                                                                                                                                                                                                                                                                                           | S4   |

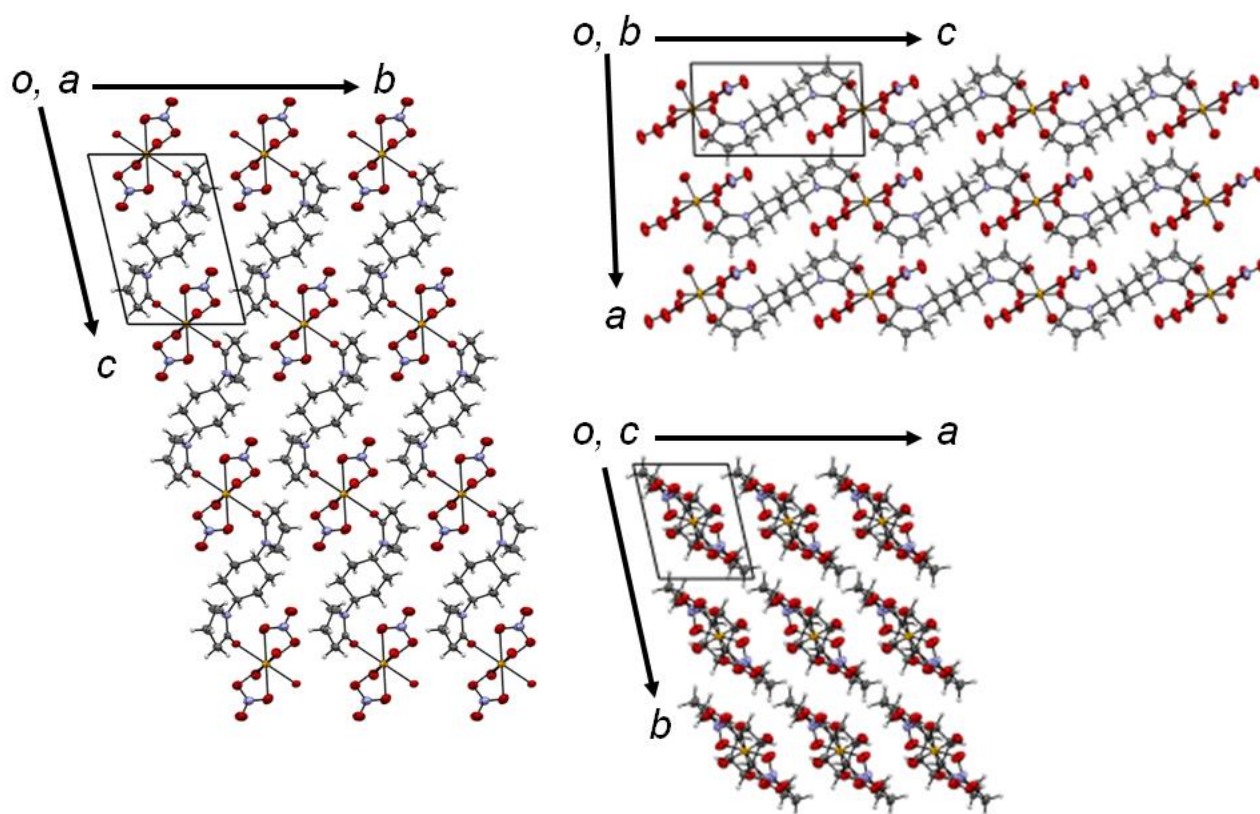

**Figure S1.** Packing diagram of  $[\text{NpO}_2(\text{NO}_3)_2(\text{L1})]_n$ .

**Table S1.** Logarithmic Stability Constants ( $\log \beta$ ) of Typical Actinyl(VI) Complexes ( $\text{AnO}_2(\text{L})_n^{m+}$ ; An = U, Np, Pu; L =  $\text{CO}_3^{2-}$ ,  $\text{CH}_3\text{COO}^-$ ,  $\text{F}^-$ ,  $\text{Cl}^-$ ,  $\text{NO}_3^-$ ,  $\text{SO}_4^{2-}$ ), in Aqueous Systems at 298 K and Zero Ionic Strength<sup>[S1, S2]</sup>

| L                         | stoichiometry                | $\log \beta$ |       |       |
|---------------------------|------------------------------|--------------|-------|-------|
|                           | $\text{AnO}_2^{2+}:\text{L}$ | An = U       | Np    | Pu    |
| $\text{CO}_3^{2-}$        | 1:1                          | 9.94         | 9.86  | 9.50  |
|                           | 1:2                          | 16.61        | 16.52 | 14.70 |
|                           | 1:3                          | 21.84        | 19.90 | 18.00 |
| $\text{CH}_3\text{COO}^-$ | 1:1                          | 3.06         | 2.92  | 2.76  |
|                           | 1:2                          | 5.57         | 5.14  | 4.47  |
|                           | 1:3                          | 6.97         | 6.91  | 5.93  |
| $\text{F}^-$              | 1:1                          | 5.16         | 4.57  | 4.56  |
|                           | 1:2                          | 8.83         | 7.60  | 7.25  |
|                           | 1:3                          | 10.90        |       |       |
|                           | 1:4                          | 11.84        |       |       |
| $\text{Cl}^-$             | 1:1                          | 0.17         | 0.40  | 0.23  |
|                           | 1:2                          | -1.10        |       | -1.15 |
| $\text{NO}_3^-$           | 1:1                          | -0.19        |       |       |
| $\text{SO}_4^{2-}$        | 1:1                          | 3.15         | 3.28  | 3.38  |
|                           | 1:2                          | 4.14         | 4.70  | 4.40  |
|                           | 1:3                          | 3.02         |       |       |

## References.

- [S1] *NIST Critically Selected Stability Constants of Metal Complexes Database*, ed. by R. M. Smith, A. E. Martell, R. J. Motekaitis, **2004**.
- [S2] *Second Update on the Chemical Thermodynamics of Uranium, Neptunium, Plutonium, Americium and Technetium*, ed. by I. Grenthe, X. Gaona, A. V. Plyasunov, L. Rao, W. H. Runde, B. Grambow, R. J. M. Konings, A. L. Smith, E. E. Moore, OECD Nuclear Energy Agency, Data Bank, Paris, France, **2020**.
